# Supplementary material for: Metabolic and Molecular Response to High-Fat Diet Differs between Rats with Constitutionally High and Low Serotonin Tone
Source: MDPI journal article supplement (doi:10.3390/ijms24032169), 2023-01-21
Supplement: s1 [file s1]

## Supplementary material

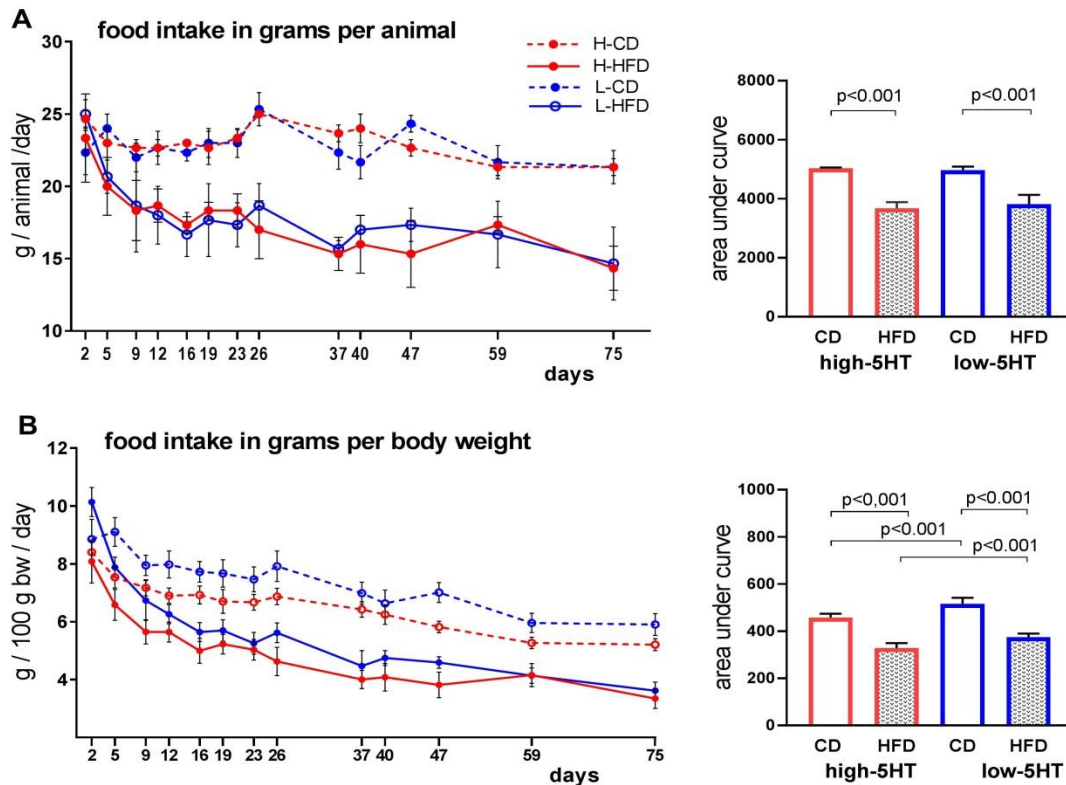

**Figure S1.** Daily food intake in animals from 5HT sublines over 11 weeks of feeding with control diet (CD) or high-fat diet (HFD), expressed in grams per animal (A), and grams per body weight (B). Corresponding AUC values are shown on the right. Data are presented as means  $\pm$  SD; N = 9 per group; p-values obtained by LSD test after one-way ANOVA. H-CD = animals from high-5HT subline on control diet; L-CD = animals from low-5HT subline on control diet; H-HFD = animals from high-5HT subline on high-fat diet; L-HFD = animals from low-5HT subline on high-fat diet.

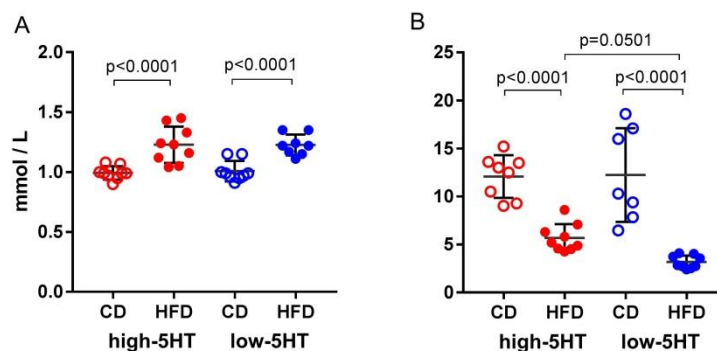

**Figure S2.** A) Serum concentration of high-density lipoprotein (HDL) and B) ratio between adiponectin and leptin plasma levels in high-5HT and low-5HT animals after 9 weeks of control diet (CD) or high-fat diet (HFD). Data are presented as individual values and mean  $\pm$  SD; N = 9 per group; p-values obtained by LSD after one-way ANOVA are indicated on figures.

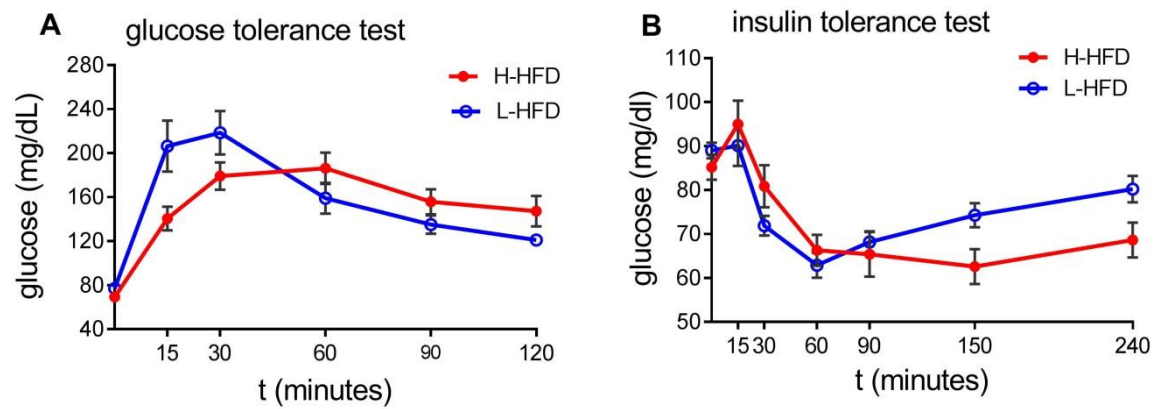

**Figure S3.** Comparison of glucose (A) and insulin (B) tolerance in animals of the high-5HT and low-5HT sublines after 9 weeks of feeding a high-fat diet. Results are presented as means  $\pm$  SEM in groups of 9 animals. The same data are in Figure 6 in the main text.

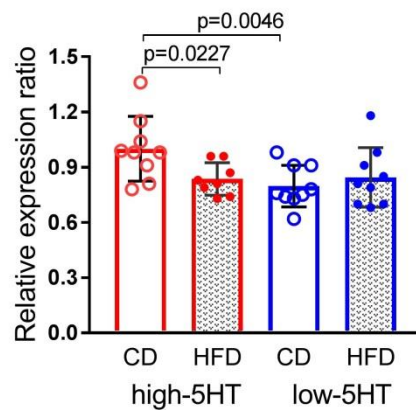

**Figure S4.** Hypothalamic mRNA expression levels of the serotonin transporter (*Sert*) in animals from high-5HT and low-5HT sublines after 11 weeks of control diet (CD) or high-fat diet (HFD). Expression levels were normalized to the mean of two reference genes (*Actb* and *Gapdh*) and are shown as a relative expression ratio between groups, with high-5HT animals receiving the control diet set at 1.00. Data are presented as means  $\pm$  SD; N = 9 per group; p-values obtained by LSD post-hoc test after one-way ANOVA.

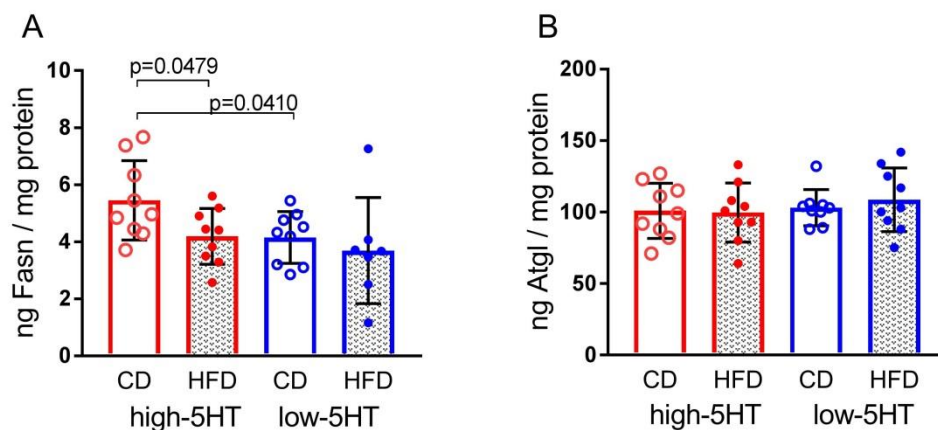

**Figure S5.** Concentration of A) fatty acid synthase (Fasn) and B) adipose triglyceride lipase (Atgl) in white adipose tissue of animals from the high-5HT and low-5HT sublines after 11 weeks on control diet (CD) or high-fat diet (HFD). Data are presented as individual values and mean  $\pm$  SD; N = 9 per group; p-values obtained by LSD after one-way ANOVA are indicated on figures.

**Table S1.** Composition and energy content of control and high-fat diet

|                             | Control diet | High-fat diet |
|-----------------------------|--------------|---------------|
| Proteins (% by weight)      | 18.5         | 21.7          |
| Carbohydrates (% by weight) | 53.5         | 41.4          |
| corn starch                 | 42.6         | 8.5           |
| sucrose                     | 3.6          | 20            |
| maltodextrin                |              | 11.5          |
| Fats (% by weight)          | 3            | 22.7          |
| % of total fat:             |              |               |
| saturated                   | 19           | 35            |
| monounsaturated             | 21           | 25            |
| polyunsaturated             | 60           | 40            |
| energy (Kcal/g)             | 2.66         | 4.6           |

Control diet: Mucedola 4RF21, Italy; High-fat diet: Envigo TD.06415 (45/Fat), USA

**Table S2.** Primer sequences used in RT-qPCR analysis

| NCBI Symbol  | Gene                                           | Forward primer sequence   | Reverse primer sequence  |
|--------------|------------------------------------------------|---------------------------|--------------------------|
| Actb         | Actin beta                                     | GCGCAAGTACTCTGTGTGGA      | GGCATCATTGACGACATCGAG    |
| Adipoq       | Adiponectin                                    | GAGACGCAGGTGTTCTTG        | CCTACGCTGAATGCTGAG       |
| Agrp         | Agouti-related peptide                         | GCAGAGGTGCTAGATCCACAGAA   | AGGACTCGTGCAGCCTTACAC    |
| Atgl/ Pnpla2 | Patatin like phospholipase domain containing 2 | AGACTGTCTGAGCAGGTGGA      | GTAGCAGAATCTCGGCATCTTCC  |
| Cart         | Cocaine- and amphetamine-regulated transcript  | GCCAAGTCCCATGTGTGAC       | CACCCCTTCACAAGCACTTCA    |
| Cebpa        | CCAAT enhancer binding protein alpha           | GACCATCCGCCTTGTGTGTA      | CTGACATTGCACAAAGGCACC    |
| Cebpd        | CCAAT/enhancer binding protein delta           | GAATTGCTACAGTTTCTTGG      | ATGCGCAGTCTCTTCCTC       |
| Fabp4        | Fatty acid binding protein 4                   | AGAAGTGGGAGTTGGCTTCG      | ACTCTCTGACCGGATGACGA     |
| Fasn         | Fatty acid synthase                            | GGTAGGCTTGGTGAAGTGTCTC    | TCTAACTGGAAGTGACGGAAGG   |
| Fgf10        | Fibroblast growth factor 10                    | GAGATGTCCGCTGGAGAAAG      | CCCCTTCTTGTTCATGGCTA     |
| Fgf21        | Fibroblast growth factor 21                    | AGGCTTTGACACCCAGGATT      | ACAGATGACGACCAAGACAC     |
| Gapdh        | Glyceraldehyde-3-phosphate dehydrogenase       | TGCCCCCATGTTTGTGATG       | TGGTGGTGCAGGATGCATT      |
| Glut1        | Glucose transporter 1                          | TGGCCAAGGACACACGAATACTGA  | TGGAAGAGACAGGAATGGGCGAAT |
| Glut3        | Glucose transporter 3                          | TGGCTACAACACCGGAGTCATCAA  | CTGCCAAAGCGGTTGACAAAGAGT |
| Glut4        | Glucose transporter 4                          | ATCAACGCCCCACAGAAAGT      | CCTGCCTACCGCCAAAGT       |
| Hcrt         | Hypocretin neuropeptide precursor              | TAGAGCCATATCCCTGCCCT      | GCGAGGAGAGGGGAAAGTTAG    |
| Hcrtr1       | Hypocretin receptor 1                          | GCGCGATTATCTCTATCCGAA     | AAGGCTATGAGAAACACGGCC    |
| Insr         | Insulin receptor                               | ATCTCCTGGGATTCATGCTG      | TACTGGGTCCAGGGTTTGAG     |
| Irs1         | Insulin receptor substrate 1                   | GATTTAAGCACCTATGCCAG      | GAATCGTGAAAGAGTTCGAG     |
| Irs2         | Insulin receptor substrate 2                   | CCACACACCTGTCTCATTG       | TAATCCGCTTTGCCAAAATC     |
| Lep          | Leptin                                         | GACACCAAAAACCTCAT         | CAGGGTCTGGTCCATCT        |
| Lepr         | Leptin receptor                                | CCTTGGAGGACTATGGGTGTC     | GTGGCGCACAAAACAGCTTA     |
| Lipe/Hsl     | Lipase E, hormone sensitive type               | CTCCTCATGGCTCAACTCC       | ACTCCTGCGCATAGACTCC      |
| Lpl          | Lipoprotein lipase                             | TTGAGAAAGGGCTCTGCCTGAGTT  | TGCTTCTCTGGCTCTGACCTTGT  |
| Npy          | Neuropeptide Y                                 | AGAGATCCAGCCCTGAGACA      | TCACCACATGGAAGGGTCTT     |
| Npyr         | Neuropeptide Y receptor                        | GCTGTGGAACGTCATCAGCTA     | TTGATAGATCACGAAGGGCAG    |
| Pomc         | Proopiomelanocortin                            | GAGGTTAAGGAGCAGTGACTAAGA  | GTAGCAGAAATCTCGGCATCTTCC |
| Ppargc1b     | PPARG coactivator 1 beta                       | CTACCAGAGCCCACCCAGTA      | CAGGATGAGGAGCCAGAAGT     |
| Retn         | Resistin                                       | ACTTCAGCTCCCTACTG         | GTCTATGCTTCCGCACT        |
| Rps29        | Ribosomal protein S29                          | GCCAGGGTTCTCGCTCTTG       | GGCACATGTTTACGCCGTAT     |
| Sert/5htt    | Solute carrier family 6 member 4               | TCTGAAAAGCCCCACTGGACT     | TAGGACCGTGTCTTCATCAGGC   |
| Tnf          | Tumor necrosis factor                          | CATCTTCTCAAAACTCGAGTGACAA | TGGGAGTAGATAAGGTACAGCCC  |
| Ucp1         | Uncoupling protein 1                           | GGGCTGATTCTTTTGGTCTCT     | GGGTTGCACCTTCGGAAGTTGT   |
| Vegfa        | Vascular endothelial growth factor A           | CCGGTTTAAATCCTGGAGCG      | TTTAACTCAAGCTGCCTCGC     |
| Wnt10b       | Wnt family member 10B                          | GTAATCACGACATGGACTTTGGAG  | GCACCTCCGCTTCAGGTTTT     |
